# Supplementary material for: Weight Categories among Male Adolescents Linked to Risky Behaviors: High or Low BMI, Which Is Worse?
Source: MDPI journal article supplement (doi:10.3390/adolescents2010012), 2022-03-18
Supplement: s1 [file s1]

Archive with 2 entries (2 files):
- File S1. Descriptive table.pdf
- File S2. ESPAD_METHODOLOGY.pdf
