# Supplementary material for: Weight Categories among Male Adolescents Linked to Risky Behaviors: High or Low BMI, Which Is Worse?
Source: MDPI journal article supplement (doi:10.3390/adolescents2010012), 2022-03-18
Supplement: s1 [file s1]

## Sample Descriptive Information

|                                                          |                      | Normal weight  | Under weight   | Over weight    |               |
|----------------------------------------------------------|----------------------|----------------|----------------|----------------|---------------|
| Variables                                                |                      | Proportion (%) | Proportion (%) | Proportion (%) |               |
| Have you ever been physical activity in your life?       | No                   | 4.5            | 6.6* (0.019)   | 6.3            |               |
|                                                          | Yes                  | 95.5* (0.019)  | 93.4           | 93.7           |               |
| Physical activity frequencies during the last year       | Never                | 1.3            | 1.1            | 0.8            |               |
|                                                          | Rarely               | 5.1            | 7.8* (0.006)   | 8.1* (0.001)   |               |
|                                                          | 1-2 times a month    | 6.6            | 8.7            | 11.8* (0.001)  |               |
|                                                          | 1-2 times per week   | 25.9           | 30.7* (0.011)  | 29.8* (0.043)  |               |
|                                                          | 3-4 times per week   | 35.4* (0.002)  | 29.4           | 31.2           |               |
|                                                          | Almost every day     | 25.6* (0.000)  | 22.3           | 18.2           |               |
| Quality of the relationship with                         | Parents              | Dissatisfied   | 14.4           | 14.5           | 15.1          |
|                                                          |                      | Satisfied      | 85.6           | 85.5           | 84.9          |
|                                                          | Friends              | Dissatisfied   | 10.7           | 11.0           | 13.5* (0.044) |
|                                                          |                      | Satisfied      | 89.3* (0.044)  | 89.0           | 86.5          |
|                                                          | Brothers and Sisters | Dissatisfied   | 19.3           | 21.7           | 19.4          |
|                                                          |                      | Satisfied      | 80.7           | 78.3           | 80.6          |
|                                                          | Health               | Dissatisfied   | 12.0           | 15.0* (0.42)   | 18.6* (0.000) |
|                                                          |                      | Satisfied      | 88.0* (0.000)  | 85.0           | 81.4          |
|                                                          | Him/Herself          | Dissatisfied   | 23.8           | 24.6           | 28.2* (0.017) |
|                                                          |                      | Satisfied      | 76.2* (0.017)  | 75.4           | 71.8          |
| Academic performance                                     | High                 | 9.4            | 8.7            | 7.5            |               |
|                                                          | Good                 | 39.2           | 41.2* (0.026)  | 35.4           |               |
|                                                          | Medium               | 45.4           | 45.3           | 50.5* (0.012)  |               |
|                                                          | Low                  | 5.9            | 4.8            | 6.7            |               |
| Gambler's profile                                        | No problem           | 76.4* (0.003)  | 75.3           | 69.3           |               |
|                                                          | At risk              | 15.2           | 14.4           | 20.1* (0.022)  |               |
|                                                          | Problem              | 8.5            | 10.3           | 10.7           |               |
| Use of alcohol in the last 30 days                       | Yes                  | 69.0* (0.000)  | 57.2           | 68.3* (0.000)  |               |
| Use of cigarettes in the last 30 days                    | Yes                  | 33.1* (0.000)  | 25.8           | 39.1* (0.001)  |               |
| Use of cannabis in the last 30 days                      | Yes                  | 19.0* (0.000)  | 12.6           | 18.3* (0.002)  |               |
| Use of energy drink in the last 30 days                  | Yes                  | 43.1           | 41.2           | 41.8           |               |
| Use of any other illegal substances during the last year | Yes                  | 3.7            | 2.7            | 4.6            |               |
| I think I spend way too much time playing games          | I agree              | 38.3           | 36.6           | 41.0           |               |
| I get in bad mood when I cannot spend time on games      | I agree              | 13.4           | 17.5* (0.013)  | 13.6           |               |
| My parents say that I spend way too much time on gaming  | I agree              | 34.4           | 41.7* (0.001)  | 38.2           |               |

\*proportion statistically significant based on the compare column proportions test ( $\alpha = .05$ , Bonferroni adjust  $p$ -values for multiple comparison).
